# Supplementary material for: Seasonal environmental factors drive microbial community succession and flavor quality during acetic acid fermentation of Zhenjiang aromatic vinegar
Source: Front Microbiol. 2024 Aug 7;15:1442604. doi: 10.3389/fmicb.2024.1442604 (PMC11335490; doi:10.3389/fmicb.2024.1442604)
Supplement: Supplementary file 2 [file Table_2.XLSX]

## Sheet: Table S2
Table S2 Correlation Analysis Table of Difference Core Fungi and Flavor Substances of ZAV.
Differential core microorganisms	positive		negtive
	Flavor substances of ZAV	pvalue	Flavor substances of ZAV	pvalue
[Candida]_mucifera	1-Hexanol	0.8	1-Butanol, 3-methyl-	0.91
	1-Nonanol	0.49	1-Butanol, 3-methyl-, acetate	0.1
	1-Propanol, 2-methyl-	0.84	1-Heptanol	0.48
	4-Methylcyclohexaneacetic acid	0	1-Hexanol, 2-ethyl-	0.39
	6-Nonynoic acid	0	1-Octanol	0.74
	9-Octadecenoic acid, ethyl ester	0	2(3H)-Furanone, dihydro-5-pentyl-	0.59
	Amylene hydrate	0	2,3-Butanediol, [S-(R*,R*)]-	0.55
	Benzeneacetaldehyde	0	4-Nonanone, 2,6,8-trimethyl-	0.35
	Benzeneacetic acid, ethyl ester	0.86	acetic acid	0.7
	Benzoic acid, ethyl ester	0	Acetic acid ethenyl ester	0.8
	Butanal, 3-methyl-	0	Acetic acid, 2-phenylethyl ester	0.19
	Diethyl azelate	0.43	Acetic acid, butyl ester	0.65
	Dodecanoic acid, ethyl ester	0	Acetic acid, hexyl ester	0.45
	Heptanoic acid, ethyl ester	0.3	Acetoin	0.78
	Hexadecanoic acid, ethyl ester	0	Ala	0.01
	Hexanoic acid, ethyl ester	0.47	Arg	0.02
	His	0	Asn	0.17
	Isopropyl Alcohol	0	Benzaldehyde	0.95
	lactic acid	0.04	Benzeneacetaldehyde, .alpha.-ethylidene-	0.72
	Nonanoic acid, ethyl ester	0.71	Benzeneethanol, b-ethyl-	0.6
	oxalic acid	0.01	Butanedioic acid, diethyl ester	0.49
	Pentadecanoic acid, ethyl ester	0	Butanoic acid, 2-methyl-, ethyl ester	0.8
	Pentanoic acid, ethyl ester	0.01	Butanoic acid, 3-methyl-	0.43
	tartaric acid	0.02	citric acid	0.22
	Thr	0	Decanoic acid, ethyl ester	0.53
			Dodecanoic acid, 3-hydroxy-	0.8
			Ethanol	0.45
			Ethyl 4-acetoxybutanoate	0.34
			Ethyl Acetate	0.46
			Furfural	0.65
			gamma-Nonanolactone	0.04
			Gln	0.12
			Gly	0.03
			Heptanoic acid	0.7
			Heptyl isobutyl ketone	0.39
			Hexanoic acid	0.37
			Hexyl methacrylate	0.69
			Ile	0.04
			Isobutyl acetate	0.09
			Leu	0.01
			Lys	0.01
			malic acid	0.26
			Met	0.35
			Methyl vinyl ketone	0.8
			n-Propyl acetate	0.55
			Octanoic acid	0.52
			Octanoic acid, ethyl ester	0.49
			Pentanoic acid, 2-hydroxy-4-methyl-, ethyl ester	0.45
			Phe	0.01
			Phenylethyl Alcohol	0.35
			Propanoic acid, 2-hydroxy-, ethyl ester	0.36
			Propanoic acid, 2-methyl-	0.52
			pyroglutamic acid	0.02
			pyruvic acid	0
			Ser	0.01
			succinic acid	0.22
			Tetradecanoic acid, ethyl ester	0.01
			Tyr	0
			Val	0.02
[Pichia]_myanmarensis	1-Heptanol	0.96	1-Butanol, 3-methyl-	0.39
	1-Hexanol, 2-ethyl-	0.86	1-Butanol, 3-methyl-, acetate	0.81
	1-Nonanol	0.81	1-Hexanol	0.56
	1-Octanol	0.83	1-Propanol, 2-methyl-	0.48
	2,3-Butanediol, [S-(R*,R*)]-	0.02	2(3H)-Furanone, dihydro-5-pentyl-	0.27
	4-Methylcyclohexaneacetic acid	0.66	4-Nonanone, 2,6,8-trimethyl-	0.2
	6-Nonynoic acid	0.66	Acetic acid ethenyl ester	0.6
	9-Octadecenoic acid, ethyl ester	0.64	Acetic acid, 2-phenylethyl ester	0.28
	acetic acid	0	Ala	0
	Acetic acid, butyl ester	0.02	Arg	0.01
	Acetic acid, hexyl ester	0.11	Asn	0.78
	Acetoin	0.48	Benzaldehyde	0.3
	Amylene hydrate	0.64	Benzeneacetaldehyde, .alpha.-ethylidene-	0.45
	Benzeneacetaldehyde	0.62	Benzeneacetic acid, ethyl ester	0.51
	Benzeneethanol, b-ethyl-	0	Butanoic acid, 2-methyl-, ethyl ester	0.6
	Benzoic acid, ethyl ester	0.97	Dodecanoic acid, 3-hydroxy-	0.97
	Butanal, 3-methyl-	0.77	Ethanol	0.24
	Butanedioic acid, diethyl ester	0.63	Ethyl 4-acetoxybutanoate	0.15
	Butanoic acid, 3-methyl-	0.01	Ethyl Acetate	0.15
	citric acid	0	Gln	0.01
	Decanoic acid, ethyl ester	0.8	Gly	0.02
	Diethyl azelate	0.77	Heptanoic acid, ethyl ester	0.73
	Dodecanoic acid, ethyl ester	0.65	Heptyl isobutyl ketone	0.68
	Furfural	0	Hexanoic acid, ethyl ester	0.52
	gamma-Nonanolactone	0.59	Isobutyl acetate	0.99
	Heptanoic acid	0	Leu	0
	Hexadecanoic acid, ethyl ester	0.4	Lys	0.07
	Hexanoic acid	0	Methyl vinyl ketone	0.65
	Hexyl methacrylate	0.27	Nonanoic acid, ethyl ester	0.36
	His	0.61	Octanoic acid, ethyl ester	0.22
	Ile	0.93	Pentanoic acid, 2-hydroxy-4-methyl-, ethyl ester	0.11
	Isopropyl Alcohol	0.61	Phe	0
	lactic acid	0	Phenylethyl Alcohol	0.18
	malic acid	0	Propanoic acid, 2-hydroxy-, ethyl ester	0.16
	Met	0.36	Propanoic acid, 2-methyl-	0.87
	n-Propyl acetate	0.22	pyruvic acid	0
	Octanoic acid	0	Ser	0.01
	oxalic acid	0	Tetradecanoic acid, ethyl ester	0.57
	Pentadecanoic acid, ethyl ester	0.69	Tyr	0.01
	Pentanoic acid, ethyl ester	0.72	Val	0
	pyroglutamic acid	0.92
	succinic acid	0.85
	tartaric acid	0.04
	Thr	0
Aspergillus_flavus	1-Heptanol	0.96	1-Butanol, 3-methyl-	0.47
	1-Nonanol	0.62	1-Butanol, 3-methyl-, acetate	0.09
	1-Octanol	0.7	1-Hexanol	0.69
	2,3-Butanediol, [S-(R*,R*)]-	0	1-Hexanol, 2-ethyl-	0.81
	4-Methylcyclohexaneacetic acid	0.38	1-Propanol, 2-methyl-	0.68
	6-Nonynoic acid	0.38	2(3H)-Furanone, dihydro-5-pentyl-	0.26
	9-Octadecenoic acid, ethyl ester	0.07	4-Nonanone, 2,6,8-trimethyl-	0.15
	acetic acid	0.03	Acetic acid ethenyl ester	0.59
	Acetic acid, butyl ester	0	Acetic acid, 2-phenylethyl ester	0.03
	Acetic acid, hexyl ester	0.11	Ala	0
	Acetoin	0.49	Arg	0
	Amylene hydrate	0.08	Asn	0.4
	Benzeneacetaldehyde	0.17	Benzaldehyde	0.21
	Benzeneethanol, b-ethyl-	0	Benzeneacetaldehyde, .alpha.-ethylidene-	0.43
	Benzoic acid, ethyl ester	0.29	Benzeneacetic acid, ethyl ester	0.52
	Butanal, 3-methyl-	0.19	Butanoic acid, 2-methyl-, ethyl ester	0.59
	Butanedioic acid, diethyl ester	0.39	Ethanol	0.22
	Butanoic acid, 3-methyl-	0	Ethyl 4-acetoxybutanoate	0.07
	citric acid	0	Ethyl Acetate	0.07
	Decanoic acid, ethyl ester	0.45	gamma-Nonanolactone	0.45
	Diethyl azelate	0.58	Gln	0
	Dodecanoic acid, 3-hydroxy-	0.53	Gly	0
	Dodecanoic acid, ethyl ester	0.35	Heptanoic acid, ethyl ester	1
	Furfural	0	Heptyl isobutyl ketone	0.43
	Heptanoic acid	0.1	Hexanoic acid, ethyl ester	0.71
	Hexadecanoic acid, ethyl ester	0.02	Ile	0.16
	Hexanoic acid	0	Isobutyl acetate	0.43
	Hexyl methacrylate	0.32	Leu	0
	His	0.07	Lys	0
	Isopropyl Alcohol	0.07	Met	0.87
	lactic acid	0	Nonanoic acid, ethyl ester	0.43
	malic acid	0	Octanoic acid, ethyl ester	0.21
	Methyl vinyl ketone	0	Pentanoic acid, 2-hydroxy-4-methyl-, ethyl ester	0.1
	n-Propyl acetate	0.05	Phe	0
	Octanoic acid	0	Phenylethyl Alcohol	0.11
	oxalic acid	0	Propanoic acid, 2-hydroxy-, ethyl ester	0.09
	Pentadecanoic acid, ethyl ester	0.35	pyroglutamic acid	0.36
	Pentanoic acid, ethyl ester	0.44	pyruvic acid	0
	Propanoic acid, 2-methyl-	0.85	Ser	0
	tartaric acid	0.01	succinic acid	0.55
	Thr	0	Tetradecanoic acid, ethyl ester	0.1
			Tyr	0
			Val	0
Aspergillus_penicillioides	2,3-Butanediol, [S-(R*,R*)]-	0	1-Butanol, 3-methyl-	0.31
	acetic acid	0	1-Butanol, 3-methyl-, acetate	0.91
	Acetic acid, butyl ester	0.04	1-Heptanol	0.37
	Acetic acid, hexyl ester	0.27	1-Hexanol	0.37
	Acetoin	0.12	1-Hexanol, 2-ethyl-	0.67
	Asn	0.85	1-Nonanol	0.79
	Benzeneethanol, b-ethyl-	0	1-Octanol	0.77
	Butanedioic acid, diethyl ester	0.56	1-Propanol, 2-methyl-	0.41
	Butanoic acid, 3-methyl-	0	2(3H)-Furanone, dihydro-5-pentyl-	0.34
	citric acid	0	4-Methylcyclohexaneacetic acid	0.74
	Furfural	0	4-Nonanone, 2,6,8-trimethyl-	0.28
	gamma-Nonanolactone	0.14	6-Nonynoic acid	0.74
	Heptanoic acid	0	9-Octadecenoic acid, ethyl ester	0.85
	Hexadecanoic acid, ethyl ester	0.93	Acetic acid ethenyl ester	0.65
	Hexanoic acid	0	Acetic acid, 2-phenylethyl ester	0.54
	Hexyl methacrylate	0.3	Ala	0.01
	Ile	0.16	Amylene hydrate	0.84
	Isobutyl acetate	0.69	Arg	0.05
	lactic acid	0.01	Benzaldehyde	0.3
	malic acid	0	Benzeneacetaldehyde	0.79
	Met	0.08	Benzeneacetaldehyde, .alpha.-ethylidene-	0.51
	Methyl vinyl ketone	0	Benzeneacetic acid, ethyl ester	0.53
	n-Propyl acetate	0.27	Benzoic acid, ethyl ester	0.5
	Octanoic acid	0	Butanal, 3-methyl-	0.67
	oxalic acid	0	Butanoic acid, 2-methyl-, ethyl ester	0.65
	pyroglutamic acid	0.38	Decanoic acid, ethyl ester	0.84
	succinic acid	0.44	Diethyl azelate	0.67
	tartaric acid	0.02	Dodecanoic acid, 3-hydroxy-	0.8
	Tetradecanoic acid, ethyl ester	0.93	Dodecanoic acid, ethyl ester	0.72
	Thr	0.19	Ethanol	0.27
			Ethyl 4-acetoxybutanoate	0.45
			Ethyl Acetate	0.23
			Gln	0.01
			Gly	0.08
			Heptanoic acid, ethyl ester	0.35
			Heptyl isobutyl ketone	0.79
			Hexanoic acid, ethyl ester	0.33
			His	0.83
			Isopropyl Alcohol	0.9
			Leu	0.01
			Lys	0.2
			Nonanoic acid, ethyl ester	0.26
			Octanoic acid, ethyl ester	0.26
			Pentadecanoic acid, ethyl ester	0.71
			Pentanoic acid, 2-hydroxy-4-methyl-, ethyl ester	0.17
			Pentanoic acid, ethyl ester	0.67
			Phe	0
			Phenylethyl Alcohol	0.22
			Propanoic acid, 2-hydroxy-, ethyl ester	0.17
			Propanoic acid, 2-methyl-	0.82
			pyruvic acid	0.01
			Ser	0.03
			Tyr	0.04
			Val	0.01
Cladophialophora_eucalypti	1-Hexanol	0.87	1-Butanol, 3-methyl-	0.95
	1-Nonanol	0.54	1-Butanol, 3-methyl-, acetate	0.18
	1-Propanol, 2-methyl-	0.86	1-Heptanol	0.56
	9-Octadecenoic acid, ethyl ester	0	1-Hexanol, 2-ethyl-	0.48
	Amylene hydrate	0	1-Octanol	0.78
	Benzaldehyde	0.98	2(3H)-Furanone, dihydro-5-pentyl-	0.66
	Benzeneacetaldehyde	0	2,3-Butanediol, [S-(R*,R*)]-	0.62
	Benzoic acid, ethyl ester	0	4-Methylcyclohexaneacetic acid	0.83
	Butanal, 3-methyl-	0	4-Nonanone, 2,6,8-trimethyl-	0.44
	Diethyl azelate	0.54	6-Nonynoic acid	0.83
	Dodecanoic acid, ethyl ester	0.52	acetic acid	0.92
	Heptanoic acid, ethyl ester	0.76	Acetic acid ethenyl ester	0.83
	Hexadecanoic acid, ethyl ester	0	Acetic acid, 2-phenylethyl ester	0.3
	Hexanoic acid, ethyl ester	0.8	Acetic acid, butyl ester	0.71
	His	0	Acetic acid, hexyl ester	0.54
	Isopropyl Alcohol	0.08	Acetoin	0.62
	lactic acid	0.11	Ala	0.04
	Nonanoic acid, ethyl ester	0.52	Arg	0.07
	oxalic acid	0.03	Asn	0.31
	Pentadecanoic acid, ethyl ester	0	Benzeneacetaldehyde, .alpha.-ethylidene-	0.76
	Pentanoic acid, ethyl ester	0.05	Benzeneacetic acid, ethyl ester	0.82
	tartaric acid	0.27	Benzeneethanol, b-ethyl-	0.66
	Thr	0.01	Butanedioic acid, diethyl ester	0.57
			Butanoic acid, 2-methyl-, ethyl ester	0.83
			Butanoic acid, 3-methyl-	0.52
			citric acid	0.45
			Decanoic acid, ethyl ester	0.61
			Dodecanoic acid, 3-hydroxy-	0.83
			Ethanol	0.53
			Ethyl 4-acetoxybutanoate	0.43
			Ethyl Acetate	0.55
			Furfural	0.71
			gamma-Nonanolactone	0.11
			Gln	0.19
			Gly	0.09
			Heptanoic acid	0.75
			Heptyl isobutyl ketone	0.48
			Hexanoic acid	0.46
			Hexyl methacrylate	0.74
			Ile	0.12
			Isobutyl acetate	0.17
			Leu	0.04
			Lys	0.05
			malic acid	0.34
			Met	0.48
			Methyl vinyl ketone	0.83
			n-Propyl acetate	0.62
			Octanoic acid	0.59
			Octanoic acid, ethyl ester	0.56
			Pentanoic acid, 2-hydroxy-4-methyl-, ethyl ester	0.53
			Phe	0.04
			Phenylethyl Alcohol	0.44
			Propanoic acid, 2-hydroxy-, ethyl ester	0.45
			Propanoic acid, 2-methyl-	0.6
			pyroglutamic acid	0.07
			pyruvic acid	0.01
			Ser	0.03
			succinic acid	0.28
			Tetradecanoic acid, ethyl ester	0.06
			Tyr	0.02
			Val	0.05
Meyerozyma_caribbica	2,3-Butanediol, [S-(R*,R*)]-	0	1-Butanol, 3-methyl-	0.5
	acetic acid	0.01	1-Butanol, 3-methyl-, acetate	0.43
	Acetic acid, butyl ester	0.55	1-Heptanol	0.56
	Acetic acid, hexyl ester	0.62	1-Hexanol	0.58
	Acetoin	0.13	1-Hexanol, 2-ethyl-	0.38
	Asn	0.91	1-Nonanol	0.78
	Benzeneethanol, b-ethyl-	0	1-Octanol	0.88
	Butanedioic acid, diethyl ester	0.3	1-Propanol, 2-methyl-	0.66
	Butanoic acid, 3-methyl-	0	2(3H)-Furanone, dihydro-5-pentyl-	0.58
	citric acid	0	4-Methylcyclohexaneacetic acid	0.84
	Furfural	0	4-Nonanone, 2,6,8-trimethyl-	0.33
	gamma-Nonanolactone	0.47	6-Nonynoic acid	0.84
	Heptanoic acid	0	9-Octadecenoic acid, ethyl ester	0.72
	Hexanoic acid	0	Acetic acid ethenyl ester	0.79
	Hexyl methacrylate	0.98	Acetic acid, 2-phenylethyl ester	0.16
	Ile	0.59	Ala	0.02
	Isobutyl acetate	0.93	Amylene hydrate	0.72
	lactic acid	0.01	Arg	0.12
	malic acid	0	Benzaldehyde	0.49
	Met	0.28	Benzeneacetaldehyde	0.7
	Methyl vinyl ketone	0	Benzeneacetaldehyde, .alpha.-ethylidene-	0.7
	n-Propyl acetate	0.77	Benzeneacetic acid, ethyl ester	0.83
	Octanoic acid	0	Benzoic acid, ethyl ester	0.75
	oxalic acid	0	Butanal, 3-methyl-	0.69
	pyroglutamic acid	0.5	Butanoic acid, 2-methyl-, ethyl ester	0.79
	succinic acid	0.56	Decanoic acid, ethyl ester	0.81
	tartaric acid	0.01	Diethyl azelate	0.92
	Thr	0.21	Dodecanoic acid, 3-hydroxy-	0.79
			Dodecanoic acid, ethyl ester	0.82
			Ethanol	0.44
			Ethyl 4-acetoxybutanoate	0.32
			Ethyl Acetate	0.29
			Gln	0.04
			Gly	0.12
			Heptanoic acid, ethyl ester	0.51
			Heptyl isobutyl ketone	0.37
			Hexadecanoic acid, ethyl ester	0.94
			Hexanoic acid, ethyl ester	0.54
			His	0.72
			Isopropyl Alcohol	0.75
			Leu	0.02
			Lys	0.17
			Nonanoic acid, ethyl ester	0.45
			Octanoic acid, ethyl ester	0.47
			Pentadecanoic acid, ethyl ester	0.8
			Pentanoic acid, 2-hydroxy-4-methyl-, ethyl ester	0.43
			Pentanoic acid, ethyl ester	0.79
			Phe	0.01
			Phenylethyl Alcohol	0.33
			Propanoic acid, 2-hydroxy-, ethyl ester	0.34
			Propanoic acid, 2-methyl-	0.87
			pyruvic acid	0.01
			Ser	0.05
			Tetradecanoic acid, ethyl ester	0.91
			Tyr	0.04
			Val	0.01
Tilletia_vankyi	1-Butanol, 3-methyl-	0.88	1-Butanol, 3-methyl-, acetate	0.16
	1-Hexanol	0.97	1-Heptanol	0.91
	1-Nonanol	0.39	1-Hexanol, 2-ethyl-	0.66
	1-Octanol	0.49	2(3H)-Furanone, dihydro-5-pentyl-	0.63
	1-Propanol, 2-methyl-	0.6	4-Methylcyclohexaneacetic acid	0.82
	2,3-Butanediol, [S-(R*,R*)]-	0.98	4-Nonanone, 2,6,8-trimethyl-	0.54
	9-Octadecenoic acid, ethyl ester	0	6-Nonynoic acid	0.82
	Amylene hydrate	0	acetic acid	0.16
	Benzeneacetaldehyde	0.09	Acetic acid ethenyl ester	0.82
	Benzoic acid, ethyl ester	0.17	Acetic acid, 2-phenylethyl ester	0.27
	Butanal, 3-methyl-	0.1	Acetic acid, butyl ester	0.69
	Decanoic acid, ethyl ester	0.76	Acetic acid, hexyl ester	0.51
	Diethyl azelate	0.51	Acetoin	0.87
	Dodecanoic acid, 3-hydroxy-	0.43	Ala	0.03
	Heptanoic acid, ethyl ester	0.75	Arg	0.02
	Hexadecanoic acid, ethyl ester	0	Asn	0.12
	Hexanoic acid, ethyl ester	0.84	Benzaldehyde	0.58
	His	0	Benzeneacetaldehyde, .alpha.-ethylidene-	0.74
	Isopropyl Alcohol	0	Benzeneacetic acid, ethyl ester	0.5
	lactic acid	0.52	Benzeneethanol, b-ethyl-	0.64
	Octanoic acid	1	Butanedioic acid, diethyl ester	0.78
	oxalic acid	0.61	Butanoic acid, 2-methyl-, ethyl ester	0.82
	Pentadecanoic acid, ethyl ester	0.76	Butanoic acid, 3-methyl-	0.48
	Pentanoic acid, ethyl ester	0.38	citric acid	0.09
	Thr	0.85	Dodecanoic acid, ethyl ester	0.92
			Ethanol	0.55
			Ethyl 4-acetoxybutanoate	0.4
			Ethyl Acetate	0.51
			Furfural	0.68
			gamma-Nonanolactone	0.06
			Gln	0.12
			Gly	0.05
			Heptanoic acid	0.73
			Heptyl isobutyl ketone	0.71
			Hexanoic acid	0.6
			Hexyl methacrylate	0.72
			Ile	0
			Isobutyl acetate	0.14
			Leu	0.02
			Lys	0.02
			malic acid	0.25
			Met	0.08
			Methyl vinyl ketone	0.82
			Nonanoic acid, ethyl ester	0.89
			n-Propyl acetate	0.59
			Octanoic acid, ethyl ester	0.56
			Pentanoic acid, 2-hydroxy-4-methyl-, ethyl ester	0.5
			Phe	0.03
			Phenylethyl Alcohol	0.45
			Propanoic acid, 2-hydroxy-, ethyl ester	0.42
			Propanoic acid, 2-methyl-	0.57
			pyroglutamic acid	0.04
			pyruvic acid	0
			Ser	0.01
			succinic acid	0.16
			tartaric acid	0.25
			Tetradecanoic acid, ethyl ester	0.07
			Tyr	0.01
			Val	0.04
Trichothecium_ovalisporum	1-Butanol, 3-methyl-	0.59	1-Butanol, 3-methyl-, acetate	0.06
	1-Heptanol	0.04	2(3H)-Furanone, dihydro-5-pentyl-	0.5
	1-Hexanol	0.1	4-Methylcyclohexaneacetic acid	0.74
	1-Hexanol, 2-ethyl-	0.92	4-Nonanone, 2,6,8-trimethyl-	0.63
	1-Nonanol	0	6-Nonynoic acid	0.74
	1-Octanol	0	acetic acid	0.67
	1-Propanol, 2-methyl-	0.24	Acetic acid ethenyl ester	0.74
	2,3-Butanediol, [S-(R*,R*)]-	0.05	Acetic acid, 2-phenylethyl ester	0.12
	9-Octadecenoic acid, ethyl ester	0.06	Acetic acid, butyl ester	0.57
	Amylene hydrate	0.06	Acetic acid, hexyl ester	0.44
	Benzeneacetaldehyde	0	Acetoin	0.29
	Benzoic acid, ethyl ester	0.03	Ala	0
	Butanal, 3-methyl-	0.01	Arg	0
	Butanedioic acid, diethyl ester	0.38	Asn	0.25
	Decanoic acid, ethyl ester	0	Benzaldehyde	0.47
	Diethyl azelate	0	Benzeneacetaldehyde, .alpha.-ethylidene-	0.64
	Dodecanoic acid, 3-hydroxy-	0	Benzeneacetic acid, ethyl ester	0.7
	Heptanoic acid, ethyl ester	0	Benzeneethanol, b-ethyl-	0.5
	Heptyl isobutyl ketone	0.74	Butanoic acid, 2-methyl-, ethyl ester	0.74
	Hexadecanoic acid, ethyl ester	0	Butanoic acid, 3-methyl-	0.32
	Hexanoic acid	0.79	citric acid	0.38
	Hexanoic acid, ethyl ester	0.08	Dodecanoic acid, ethyl ester	0.91
	His	0.1	Ethanol	0.49
	Isopropyl Alcohol	0.22	Ethyl 4-acetoxybutanoate	0.22
	lactic acid	0.15	Ethyl Acetate	0.49
	malic acid	0.98	Furfural	0.56
	Nonanoic acid, ethyl ester	0.28	gamma-Nonanolactone	0.02
	Octanoic acid	0.03	Gln	0.06
	oxalic acid	0.03	Gly	0.01
	Pentadecanoic acid, ethyl ester	0.56	Heptanoic acid	0.62
	Pentanoic acid, ethyl ester	0	Hexyl methacrylate	0.97
	tartaric acid	0.81	Ile	0.01
	Thr	0.13	Isobutyl acetate	0.05
			Leu	0
			Lys	0.01
			Met	0.11
			Methyl vinyl ketone	0.74
			n-Propyl acetate	0.44
			Octanoic acid, ethyl ester	0.48
			Pentanoic acid, 2-hydroxy-4-methyl-, ethyl ester	0.33
			Phe	0
			Phenylethyl Alcohol	0.36
			Propanoic acid, 2-hydroxy-, ethyl ester	0.25
			Propanoic acid, 2-methyl-	0.42
			pyroglutamic acid	0.01
			pyruvic acid	0.02
			Ser	0
			succinic acid	0.15
			Tetradecanoic acid, ethyl ester	0.03
			Tyr	0
			Val	0.01
Unassigned	1-Heptanol	0.01	1-Butanol, 3-methyl-	0.66
	1-Hexanol, 2-ethyl-	0	1-Butanol, 3-methyl-, acetate	0.12
	4-Methylcyclohexaneacetic acid	0.09	1-Hexanol	0.63
	6-Nonynoic acid	0.09	1-Nonanol	0.99
	9-Octadecenoic acid, ethyl ester	0	1-Octanol	0.75
	Amylene hydrate	0	1-Propanol, 2-methyl-	0.32
	Benzeneacetaldehyde	0.62	2(3H)-Furanone, dihydro-5-pentyl-	0.16
	Benzoic acid, ethyl ester	0.03	2,3-Butanediol, [S-(R*,R*)]-	0.47
	Butanal, 3-methyl-	0	4-Nonanone, 2,6,8-trimethyl-	0.77
	Dodecanoic acid, 3-hydroxy-	0	acetic acid	0.33
	Dodecanoic acid, ethyl ester	0.09	Acetic acid ethenyl ester	0.51
	Heptanoic acid, ethyl ester	0.43	Acetic acid, 2-phenylethyl ester	0.23
	Heptyl isobutyl ketone	0.02	Acetic acid, butyl ester	0.58
	Hexadecanoic acid, ethyl ester	0	Acetic acid, hexyl ester	0.16
	His	0	Acetoin	0.59
	Isopropyl Alcohol	0	Ala	0.01
	oxalic acid	1	Arg	0
	Pentadecanoic acid, ethyl ester	0.14	Asn	0.06
	Pentanoic acid, ethyl ester	0.75	Benzaldehyde	0.31
	Thr	0.74	Benzeneacetaldehyde, .alpha.-ethylidene-	0.34
			Benzeneacetic acid, ethyl ester	0.28
			Benzeneethanol, b-ethyl-	0.46
			Butanedioic acid, diethyl ester	0.18
			Butanoic acid, 2-methyl-, ethyl ester	0.51
			Butanoic acid, 3-methyl-	0.37
			citric acid	0.02
			Decanoic acid, ethyl ester	0.87
			Diethyl azelate	0.87
			Ethanol	0.43
			Ethyl 4-acetoxybutanoate	0.05
			Ethyl Acetate	0.11
			Furfural	0.6
			gamma-Nonanolactone	0.07
			Gln	0.11
			Gly	0
			Heptanoic acid	0.61
			Hexanoic acid	0.33
			Hexanoic acid, ethyl ester	0.72
			Hexyl methacrylate	0.44
			Ile	0
			Isobutyl acetate	0.06
			lactic acid	0.61
			Leu	0.03
			Lys	0.1
			malic acid	0.02
			Met	0.03
			Methyl vinyl ketone	0.62
			Nonanoic acid, ethyl ester	0.5
			n-Propyl acetate	0.67
			Octanoic acid	0.44
			Octanoic acid, ethyl ester	0.45
			Pentanoic acid, 2-hydroxy-4-methyl-, ethyl ester	0.05
			Phe	0.07
			Phenylethyl Alcohol	0.37
			Propanoic acid, 2-hydroxy-, ethyl ester	0.2
			Propanoic acid, 2-methyl-	0.15
			pyroglutamic acid	0
			pyruvic acid	0.09
			Ser	0.01
			succinic acid	0.62
			tartaric acid	0.14
			Tetradecanoic acid, ethyl ester	0.03
			Tyr	0.01
			Val	0.05
Unclassified	1-Heptanol	0.03	1-Butanol, 3-methyl-	0.31
	1-Hexanol, 2-ethyl-	0.08	1-Butanol, 3-methyl-, acetate	0.43
	1-Nonanol	0.09	1-Hexanol	0.7
	1-Octanol	0.08	1-Propanol, 2-methyl-	0.36
	2,3-Butanediol, [S-(R*,R*)]-	0	2(3H)-Furanone, dihydro-5-pentyl-	0.06
	4-Methylcyclohexaneacetic acid	0.56	4-Nonanone, 2,6,8-trimethyl-	0.05
	6-Nonynoic acid	0.56	Acetic acid ethenyl ester	0.38
	9-Octadecenoic acid, ethyl ester	0.4	Acetic acid, 2-phenylethyl ester	0.22
	acetic acid	0	Ala	0
	Acetic acid, butyl ester	0.01	Arg	0
	Acetic acid, hexyl ester	0.12	Asn	0.63
	Acetoin	0.9	Benzaldehyde	0.1
	Amylene hydrate	0.36	Benzeneacetaldehyde, .alpha.-ethylidene-	0.2
	Benzeneacetaldehyde	0.03	Benzeneacetic acid, ethyl ester	0.27
	Benzeneethanol, b-ethyl-	0	Butanoic acid, 2-methyl-, ethyl ester	0.38
	Benzoic acid, ethyl ester	0.37	Dodecanoic acid, 3-hydroxy-	0.65
	Butanal, 3-methyl-	0.47	Ethanol	0.08
	Butanedioic acid, diethyl ester	0.51	Ethyl 4-acetoxybutanoate	0.01
	Butanoic acid, 3-methyl-	0.01	Ethyl Acetate	0.03
	citric acid	0	Gln	0
	Decanoic acid, ethyl ester	0.31	Gly	0
	Diethyl azelate	0.02	Heptyl isobutyl ketone	0.73
	Dodecanoic acid, ethyl ester	0.43	Hexanoic acid, ethyl ester	0.81
	Furfural	0	Ile	0.88
	gamma-Nonanolactone	0.95	Isobutyl acetate	0.6
	Heptanoic acid	0.02	Leu	0
	Heptanoic acid, ethyl ester	0.41	Lys	0.05
	Hexadecanoic acid, ethyl ester	0.17	Nonanoic acid, ethyl ester	0.5
	Hexanoic acid	0	Octanoic acid, ethyl ester	0.06
	Hexyl methacrylate	0.01	Pentanoic acid, 2-hydroxy-4-methyl-, ethyl ester	0.01
	His	0.44	Phe	0
	Isopropyl Alcohol	0.89	Phenylethyl Alcohol	0.04
	lactic acid	0	Propanoic acid, 2-hydroxy-, ethyl ester	0.04
	malic acid	0	Propanoic acid, 2-methyl-	0.36
	Met	0.22	pyroglutamic acid	0.17
	Methyl vinyl ketone	0.08	pyruvic acid	0
	n-Propyl acetate	0.06	Ser	0
	Octanoic acid	0	Tetradecanoic acid, ethyl ester	0.08
	oxalic acid	0	Tyr	0
	Pentadecanoic acid, ethyl ester	0.19	Val	0
	Pentanoic acid, ethyl ester	0.02
	succinic acid	0.8
	tartaric acid	0.01
	Thr	0
